# Supplementary material for: A phase I dose escalation study of the LRP5 antagonist BI 905681 in patients with advanced and metastatic solid tumors
Source: PubMed Central journal article supplement — ESMO Open. 2024 Nov 30;9(11):103730. doi: 10.1016/j.esmoop.2024.103730 (PMC11670693; doi:10.1016/j.esmoop.2024.103730), 2024-11-30
Supplement: mmc1.pdf [file mmc1.pdf]

## Supplementary Material

**Supplementary Figure 1. Patient disposition**

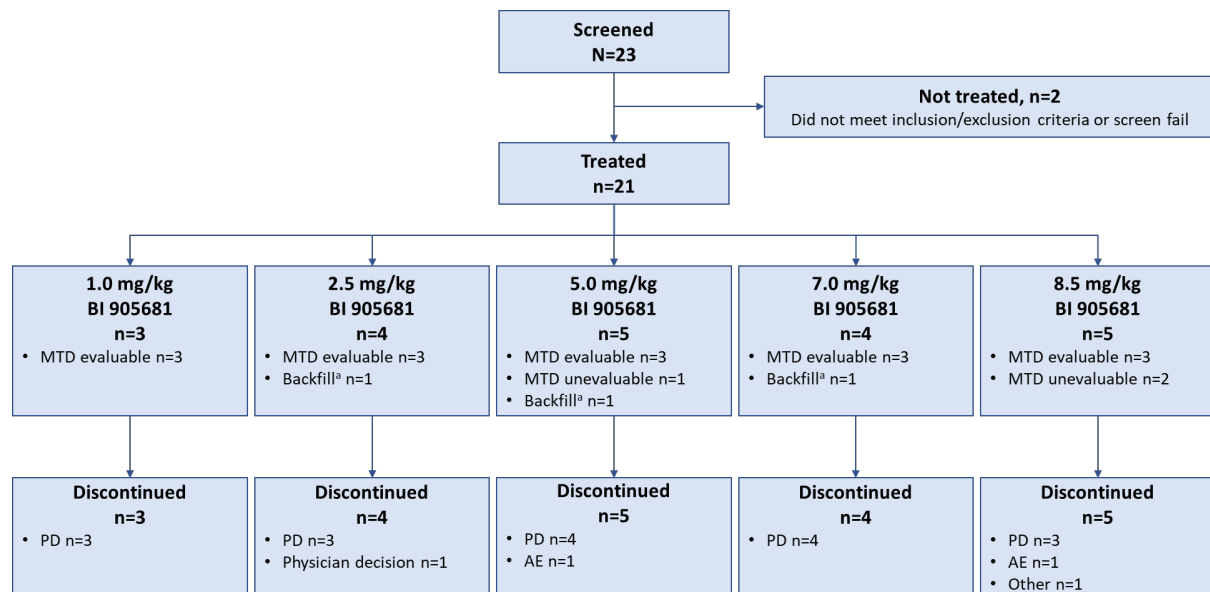

<sup>a</sup> Once each dose-level was cleared, backfilled patients with tumors harboring *RNF43* mutations or *RSPO* fusions were to be added.

AE, adverse event; MTD, maximum tolerated dose; PD, progressive disease; *RNF43*, ring finger protein 43; *RSPO*, R-spondin.

**Supplementary Figure 2.** B-CTX levels over time per BI 905681 dose level (A: 1.0 mg/kg; B: 2.5 mg/kg; C: 5.0 mg/kg; D: 7.0 mg/kg; E: 8.5 mg/kg)

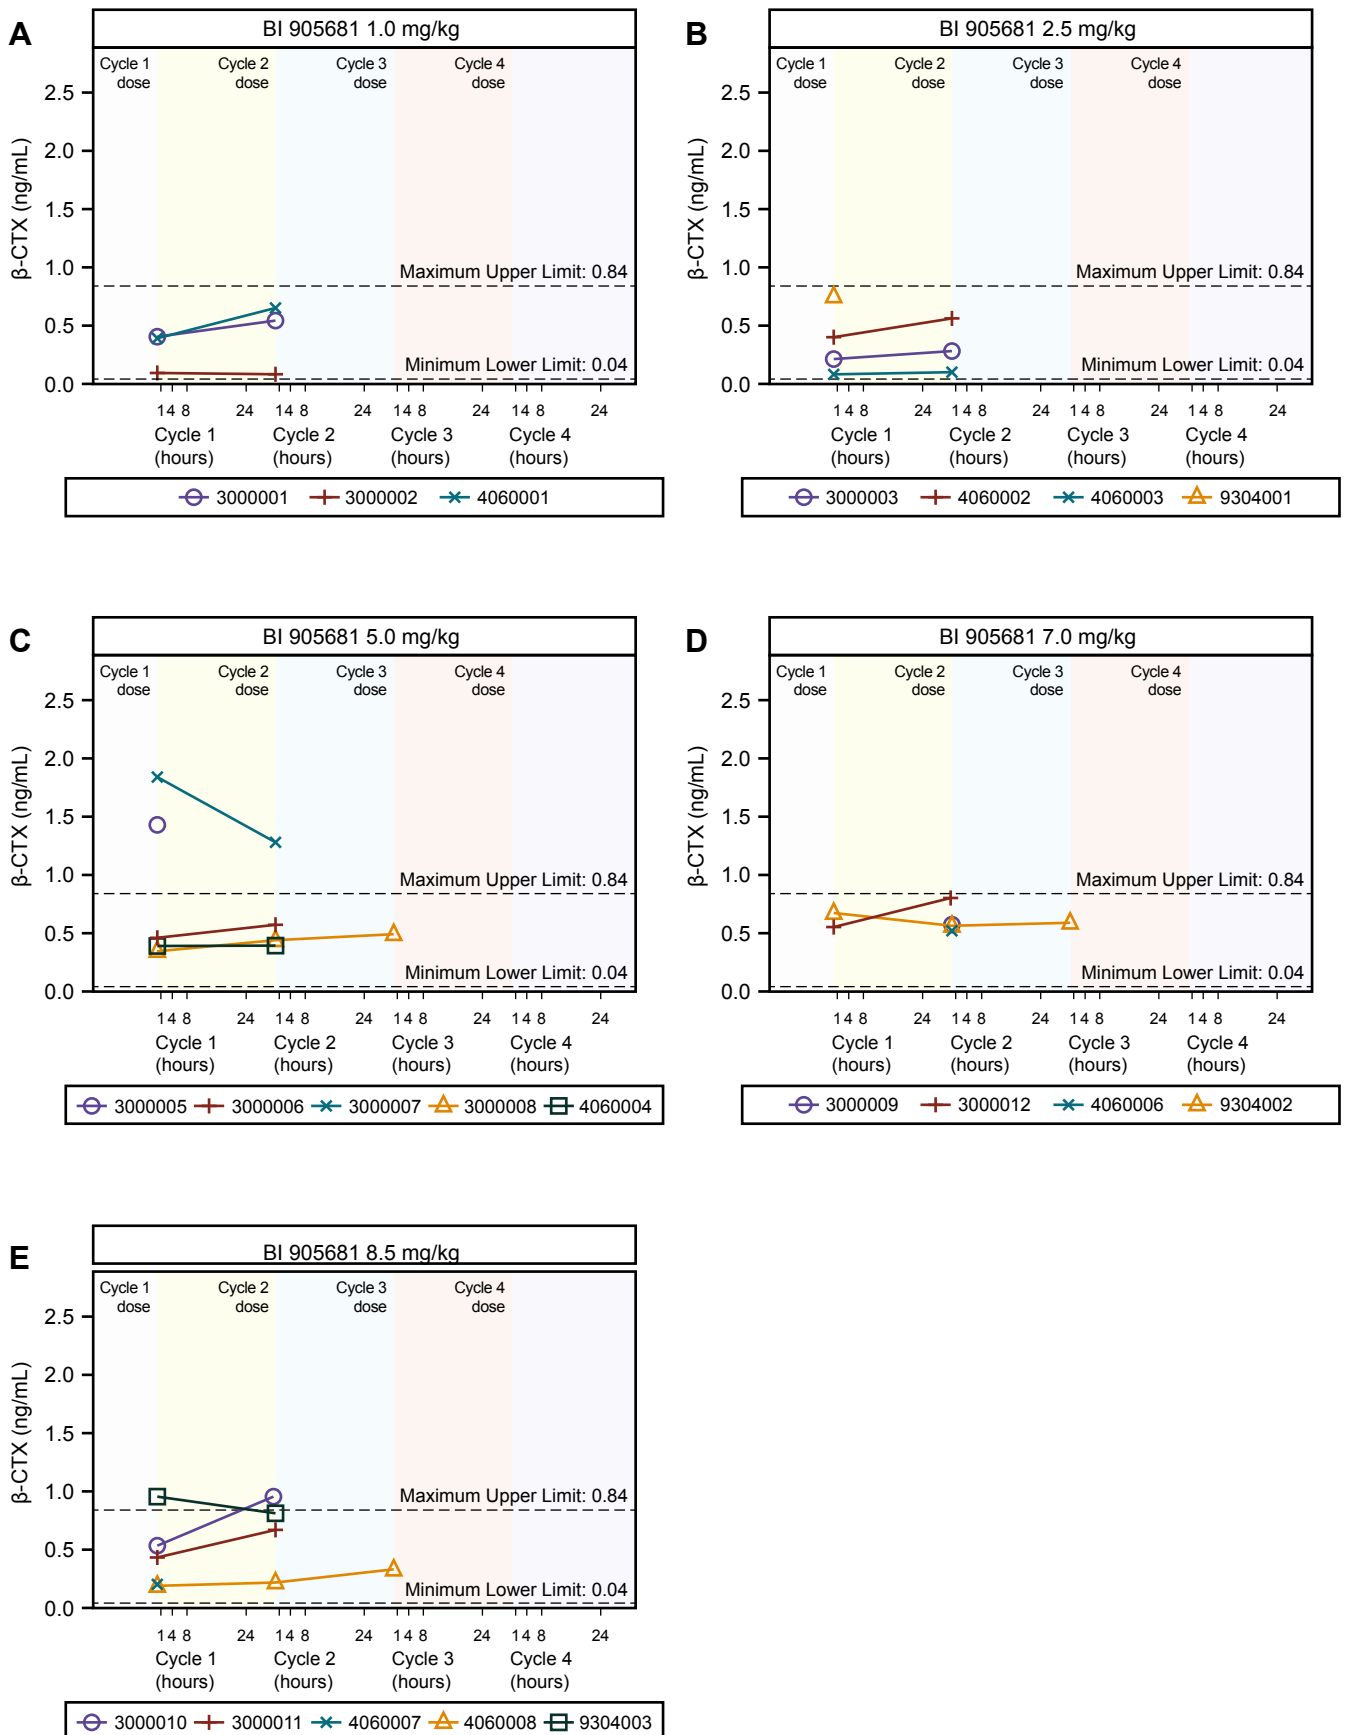

Actual times are represented relative to dosing in each cycle. End of Treatment results are not included. B-CTX is a form of C-telopeptide used as a marker of bone resorption.

**Supplementary Table 1. Definition of dose-limiting toxicities**

| <b>Dose-limiting toxicity</b>                                                                                        | <b>Grade</b> |
|----------------------------------------------------------------------------------------------------------------------|--------------|
| <b>Non-hematologic</b>                                                                                               |              |
| Bone mineral density change of >5% from baseline, confirmed $\geq 2$ months after initial observation                | -            |
| $\beta$ -CTX increase of at least two-fold from baseline                                                             | -            |
| Osteoporosis                                                                                                         | 3            |
| Retinopathy and clinically meaningful changes in fundus photography and spectral domain optical coherence tomography | $\geq 2$     |
| Any fracture without a history of trauma or as a result of a fall from standing height or less                       | -            |
| Vomiting or diarrhea (irrespective of whether adequately treated)                                                    | 4            |
| Any non-hematologic toxicity <sup>a</sup>                                                                            | $\geq 3$     |
| <b>Hematologic</b>                                                                                                   |              |
| Anemia                                                                                                               | 4            |
| Anemia requiring blood transfusion                                                                                   | 3            |
| Neutropenia present for >7 days                                                                                      | 4            |
| Febrile neutropenia                                                                                                  | $\geq 3$     |
| Neutropenia with documented infection                                                                                | 3            |
| Any thrombocytopenia with bleeding or a requirement for platelet transfusions                                        | 3            |
| Thrombocytopenia (platelets <25,000/ $\mu$ L)                                                                        | 4            |

AEs were coded using the Medical Dictionary for Drug Regulatory Activities.

$\beta$ -CTX is a form of C-telopeptide used as a marker of bone resorption.

<sup>a</sup> With the following exceptions: inadequately treated grade 3 vomiting or diarrhea persisting for <48 hours after start of adequate treatment, grade 3 vomiting or diarrhea that persists for <48 hours after start of adequate treatment, inadequately treated nausea, grade 3 fatigue that persists <7 days, and any grade 3 laboratory abnormality that is not considered clinically relevant by the investigator, resolves spontaneously or responds to conventional medical intervention.

AE, adverse event;  $\beta$ -CTX, beta-carboxy-terminal telopeptide.

**Supplementary Table 2. Treatment exposure**

|                                                       | BI 905681, mg/kg  |                   |                    |                   |                   |                   |
|-------------------------------------------------------|-------------------|-------------------|--------------------|-------------------|-------------------|-------------------|
|                                                       | 1.0<br>n=3        | 2.5<br>n=4        | 5.0<br>n=5         | 7.0<br>n=4        | 8.5<br>n=5        | Total<br>N=21     |
| <b>Number of treatment cycles, n (%)</b>              |                   |                   |                    |                   |                   |                   |
| 1                                                     | 0                 | 1 (25.0)          | 1 (20.0)           | 0                 | 1 (20.0)          | 3 (14.3)          |
| 2                                                     | 3 (100)           | 3 (75.0)          | 3 (60.0)           | 3 (75.0)          | 3 (60.0)          | 15 (71.4)         |
| 3                                                     | 0                 | 0                 | 0                  | 0                 | 0                 | 0                 |
| 4                                                     | 0                 | 0                 | 1 (20.0)           | 1 (25.0)          | 1 (20.0)          | 3 (14.3)          |
| ≥5                                                    | 0                 | 0                 | 0                  | 0                 | 0                 | 0                 |
| <b>Median number of treatment cycles, n (range)</b>   | 2.0 (2–2)         | 2.0 (1–2)         | 2.0 (1–4)          | 2.0 (2–4)         | 2.0 (1–4)         | 2.0 (1–4)         |
| <b>Number of patients with dose reductions, n (%)</b> | 0                 | 0                 | 0                  | 0                 | 1 (20.0)          | 1 (4.8)           |
| <b>Median dose intensity, % (range)</b>               | 99.9<br>(100–100) | 100.5<br>(99–102) | 100.0<br>(100–102) | 100.9<br>(99–102) | 100.7<br>(91–102) | 100.3<br>(91–102) |

**Supplementary Table 3. BI 905681 pharmacokinetics at Cycle 1**

|                                               | BI 905681, mg/kg |                  |                               |                  |                               |
|-----------------------------------------------|------------------|------------------|-------------------------------|------------------|-------------------------------|
|                                               | 1.0<br>n=3       | 2.5<br>n=4       | 5.0<br>n=4                    | 7.0<br>n=4       | 8.5<br>n=3                    |
| <b>gMean (gCV [%])</b>                        |                  |                  |                               |                  |                               |
| <b>C<sub>max</sub>, µg/mL</b>                 | NA <sup>a</sup>  | 49.6 (19.7)      | 157 (18.0) <sup>b</sup>       | 185 (23.1)       | 201 (21.4) <sup>c</sup>       |
| <b>C<sub>max,norm</sub>, (µg/mL)/mg</b>       | NA <sup>a</sup>  | 0.272 (13.8)     | 0.397 (19.0) <sup>b</sup>     | 0.297 (11.7)     | 0.264 (36.1) <sup>c</sup>     |
| <b>AUC<sub>0-tz</sub>, µg·h/mL</b>            | 4260 (27.8)      | 7640 (10.6)      | 18200 (53.2) <sup>b</sup>     | 30000 (23.8)     | 18900 (217) <sup>c</sup>      |
| <b>AUC<sub>0-tz,norm</sub>, (µg·h/mL)/mg</b>  | 56.3 (7.27)      | 41.8 (20.3)      | 46.0 (44.0) <sup>b</sup>      | 48.1 (9.63)      | 24.9 (257) <sup>c</sup>       |
| <b>AUC<sub>0-504</sub>, µg·h/mL</b>           | 4270 (27.8)      | 7820 (12.2)      | 22600 (20.6)                  | 30100 (23.3)     | 36300 (28.7)                  |
| <b>AUC<sub>0-504,norm</sub>, (µg·h/mL)/mg</b> | 56.3 (7.28)      | 42.8 (20.2)      | 54.9 (19.3)                   | 48.3 (10.1)      | 50.8 (5.12)                   |
| <b>AUC<sub>0-∞</sub>, µg·h/mL</b>             | 4910 (32.8)      | 9530 (14.1)      | 26800 (17.7)                  | 37600 (17.7)     | 49300 (35.6)                  |
| <b>AUC<sub>0-∞,norm</sub>, (µg·h/mL)/mg</b>   | 64.9 (11.4)      | 52.2 (27.7)      | 65.2 (18.9)                   | 60.3 (15.7)      | 69.0 (24.8)                   |
| <b>%AUC<sub>tz-∞</sub>, %</b>                 | 12.5 (39.1)      | 19.0 (33.0)      | 16.0 (12.7)                   | 19.6 (28.5)      | 22.8 (62.9)                   |
| <b>T<sub>1/2</sub>, day</b>                   | 7.31 (20.1)      | 8.48 (27.4)      | 8.11 (9.88)                   | 9.23 (18.4)      | 10.6 (50.6)                   |
| <b>MRT, hours</b>                             | 242 (19.5)       | 282 (26.3)       | 268 (9.28)                    | 307 (13.7)       | 366 (43.1)                    |
| <b>CL, mL/min</b>                             | 0.257 (11.4)     | 0.320 (27.7)     | 0.256 (18.9)                  | 0.276 (15.7)     | 0.241 (24.8)                  |
| <b>V<sub>z</sub>, L</b>                       | 3.90 (13.0)      | 5.63 (17.4)      | 4.31 (21.1)                   | 5.30 (3.86)      | 5.32 (23.7)                   |
| <b>V<sub>ss</sub>, L</b>                      | 3.72 (12.0)      | 5.41 (15.6)      | 4.12 (21.4)                   | 5.09 (2.91)      | 5.30 (17.6)                   |
| <b>Median (range)</b>                         |                  |                  |                               |                  |                               |
| <b>t<sub>max</sub>, hours</b>                 | NA <sup>a</sup>  | 2.56 (1.03–7.53) | 1.60 (10.2–8.00) <sup>b</sup> | 1.95 (1.08–3.98) | 3.99 (1.08–4.10) <sup>c</sup> |
| <b>t<sub>z</sub>, hours</b>                   | 504 (503–504)    | 504 (388–504)    | 504 (71.5–505) <sup>b</sup>   | 503 (480–505)    | 493 (24.2–528) <sup>c</sup>   |

<sup>a</sup> N=2 (one patient had missing data due to prolonged infusion); <sup>b</sup> N=5; <sup>c</sup> N=4.

AUC, area under the curve; CL, clearance; C<sub>max</sub>, maximum measured concentration; gCV, geometric coefficient of variation; IV, intravenous; MRT, mean residence time; NA, not applicable; PK, pharmacokinetics; PKS, pharmacokinetic set; Q3W, once every 3 weeks; t<sub>1/2</sub>, terminal half-life; t<sub>max</sub>, time to reach maximal plasma concentration; t<sub>z</sub>, last measured time; V<sub>ss</sub>, volume of distribution after intravenous infusion; V<sub>z</sub>, apparent volume of distribution during the terminal phase.

**Supplementary Table 4. BI 905681 pharmacokinetics at Cycle 2**

|                                               | BI 905681        |                  |                               |                  |                  |
|-----------------------------------------------|------------------|------------------|-------------------------------|------------------|------------------|
|                                               | 1.0 mg/kg<br>n=3 | 2.5 mg/kg<br>n=4 | 5.0 mg/kg<br>n=4              | 7.0 mg/kg<br>n=4 | 8.5 mg/kg<br>n=3 |
| <b>gMean (gCV [%])</b>                        |                  |                  |                               |                  |                  |
| <b>C<sub>max</sub>, µg/mL</b>                 | 33.7 (13.4)      | 55.6 (26.1)      | 152 (11.0) <sup>a</sup>       | 227 (22.5)       | 292 (3.43)       |
| <b>C<sub>max,norm</sub>, (µg/mL)/mg</b>       | 0.445 (7.33)     | 0.310 (18.5)     | 0.369 (13.7) <sup>a</sup>     | 0.364 (32.5)     | 0.409 (29.7)     |
| <b>AUC<sub>0-tz</sub>, µg·h/mL</b>            | 5010 (28.5)      | 10700 (32.5)     | 23700 (47.4) <sup>a</sup>     | 36800 (14.6)     | 53900 (8.68)     |
| <b>AUC<sub>0-tz,norm</sub>, (µg·h/mL)/mg</b>  | 66.1 (8.56)      | 59.9 (54.2)      | 57.8 (42.6) <sup>a</sup>      | 59.0 (20.2)      | 75.5 (34.6)      |
| <b>AUC<sub>0-504</sub>, µg·h/mL</b>           | 4960 (30.1)      | 9540 (13.0)      | 26800 (15.9)                  | 36100 (16.1)     | 50200 (17.6)     |
| <b>AUC<sub>0-504,norm</sub>, (µg·h/mL)/mg</b> | 65.5 (10.1)      | 53.3 (27.5)      | 65.8 (10.1)                   | 57.9 (18.1)      | 70.4 (26.5)      |
| <b>AUC<sub>0-∞</sub>, µg·h/mL</b>             | 5830 (39.7)      | 12400 (22.3)     | 33100 (17.1)                  | 44700 (11.7)     | 64200 (18.6)     |
| <b>AUC<sub>0-∞,norm</sub>, (µg·h/mL)/mg</b>   | 77.0 (18.8)      | 69.0 (39.4)      | 81.1 (8.65)                   | 71.7 (23.3)      | 89.9 (20.9)      |
| <b>%AUC<sub>tz-∞</sub>, %</b>                 | 10.5 (135)       | 5.88 (636)       | 6.92 (375)                    | 17.2 (25.1)      | 6.45 (1060)      |
| <b>T<sub>1/2</sub>, day</b>                   | 7.48 (34.9)      | 9.06 (26.6)      | 8.72 (6.18)                   | 9.06 (15.8)      | 9.37 (15.2)      |
| <b>MRT, hours</b>                             | 242 (35.5)       | 334 (30.6)       | 303 (5.96)                    | 298 (11.5)       | 327 (11.2)       |
| <b>CL, mL/min</b>                             | 0.254 (10.1)     | 0.313 (27.5)     | 0.253 (10.1)                  | 0.288 (18.1)     | 0.237 (26.5)     |
| <b>V<sub>ss</sub>, L</b>                      | 3.69 (25.3)      | 6.27 (3.28)      | 4.61 (15.7)                   | 5.15 (7.05)      | 4.65 (38.5)      |
| <b>LI</b>                                     | 1.01 (7.06)      | 1.00 (5.92)      | 0.939 (5.64)                  | 0.960 (6.30)     | 1.02 (17.9)      |
| <b>PTF, %</b>                                 | 296 (23.0)       | 234 (28.1)       | 218 (18.4)                    | 268 (31.8)       | 239 (20.8)       |
| <b>R<sub>A,Cmax</sub></b>                     | NA <sup>b</sup>  | 1.16 (3.80)      | 1.00 (9.95)                   | 1.22 (25.6)      | 1.34 (17.7)      |
| <b>R<sub>A,AUC0-504</sub></b>                 | 1.16 (3.02)      | 1.26 (2.95)      | 1.11 (5.46)                   | 1.20 (9.44)      | 1.39 (21.2)      |
| <b>Median (range)</b>                         |                  |                  |                               |                  |                  |
| <b>t<sub>max</sub>, hours</b>                 | 1.57 (1.48–3.98) | 1.55 (1.07–4.02) | 1.13 (1.03–1.55) <sup>a</sup> | 1.33 (1.10–1.52) | 1.50 (1.02–4.12) |
| <b>t<sub>z</sub>, hours</b>                   | 504 (504–601)    | 819 (340–1640)   | 503 (171–1460) <sup>a</sup>   | 503 (502–623)    | 504 (502–1510)   |

<sup>a</sup> N=4; <sup>b</sup> N=2 (one patient had a missing C<sub>max</sub> at Cycle 1 due to prolonged infusion).

AUC, area under the curve; CL, clearance; C<sub>max</sub>, maximum measured concentration; gCV, geometric coefficient of variation; IV, intravenous; LI, linearity index; MRT, mean residence time; NA, not applicable; PK, pharmacokinetics; PKS, pharmacokinetic set; PTF, peak-trough fluctuation; Q3W, once every 3 weeks; R<sub>A</sub>, accumulation ratio; t<sub>1/2</sub>, terminal half-life; t<sub>max</sub>, time to reach maximal plasma concentration; t<sub>z</sub>, last measured time; V<sub>ss</sub>, volume of distribution after intravenous infusion.

**Supplementary Table 5. Disease control**

|                                                         | BI 905681, mg/kg |                 |                 |                 |                 |                 |
|---------------------------------------------------------|------------------|-----------------|-----------------|-----------------|-----------------|-----------------|
|                                                         | 1.0<br>n=3       | 2.5<br>n=4      | 5.0<br>n=5      | 7.0<br>n=4      | 8.5<br>n=5      | Total<br>N=21   |
| <b>Number of patients with disease control, n (%)</b>   | 1 (33.3)         | 1 (25.0)        | 1 (20.0)        | 1 (25.0)        | 1 (20.0)        | 5 (23.8)        |
| <b>Median duration of disease control, days (range)</b> | 35.0<br>(35–35)  | 41.0<br>(41–41) | 80.0<br>(80–80) | 89.0<br>(89–89) | 80.0<br>(80–80) | 80.0<br>(35–89) |

<sup>a</sup> Median, Q1 and Q3 calculated from Kaplan-Meier curve.

Q, quartile.
